# Supplementary material for: Impact ofLycium barbarumarabinogalactan on the fecal metabolome in a DSS-induced chronic colitis mouse model
Source: Royal Society of Chemistry journal article supplement (doi:10.1039/d2fo01283a), 2022-01-01

## Supplementary information

### Impact of *Lycium barbarum* arabinogalactan on the fecal metabolome in a DSS-induced chronic colitis mouse model

Cui Cao<sup>a,b,c</sup>, Linlin Wang<sup>a,b</sup>, Chunqing Ai<sup>a,b</sup>, Guiping Gong<sup>c</sup>, Zhongfu Wang<sup>c</sup>, Linjuan Huang<sup>c\*</sup>,  
Shuang Song<sup>a,b\*</sup>, Beiwei Zhu<sup>a,b</sup>

**Table S1** HPLC-MS mobile phases for untargeted metabolomics

**Table S2** MS parameters for untargeted metabolomics

**Table S3** HPLC-MS mobile phases for targeted metabolomics

**Table S4** MS parameters for amino acids, organic acids and others

**Table S5** A list of MRM transitions for metabolites and their corresponding internal standards along with collision energy values

**Table S6** Information of differential metabolites between Normal group and DSS group

**Table S7** Information of differential metabolites between ASA group and DSS group

**Table S8** The relative concentration of metabolites in each group

**Figure S1** Rarefaction curve of all samples based on 16S rRNA gene sequencing

**Figure S2** Permutation test of OPLS-DA model showing the stability of the model. (A) Permutation test of Normal vs DSS in positive model; (B) Permutation test of ASA vs DSS in positive model; (C) Permutation test of LBP-3 vs DSS in positive model; (D) Permutation test of Normal vs DSS in negative model; (E) Permutation test of ASA vs DSS in negative model; (F) Permutation test of LBP-3 vs DSS in negative model.

**Figure S3** The roadmap for key metabolites and relevant intestinal species to validate their functions;  
FMT, fecal microbiota transplants; AAs, amino acids; OAs, organic acids.

**Table S1** HPLC-MS mobile phases for untargeted metabolomics

| Time (min) | A (%) | B (%) |
|------------|-------|-------|
| 0          | 100   | 0     |
| 5          | 80    | 20    |
| 7          | 80    | 20    |
| 14         | 0     | 100   |
| 16         | 100   | 0     |
| 21         | 100   | 0     |

For positive mode, mobile phase A: 0.1% formic acid in ultrapure water, and mobile phase B: acetonitrile. For negative mode, mobile phase A: 5% ammonium acetate and 5% acetonitrile in ultrapure water, and mobile phase B: acetonitrile.

**Table S2** MS parameters for untargeted metabolomics

| Parameters                | Setting               |
|---------------------------|-----------------------|
| Ionization method         | Electrospray          |
| Ionization mode           | Positive and negative |
| Scan type                 | TOF-MS                |
| Mass range                | 60-1200 Da            |
| IonSpray Voltage Floating | 5500 V                |
| Temperature               | 500°C                 |
| Ion Source Gas 1          | 50 psi                |
| Ion Source Gas 2          | 50 psi                |
| Duration                  | 21 min                |
| Accumulation time         | 0.199932 secs         |
| Curtain Gas               | 35.0 psi              |
| Declustering Potential    | ± 80 V                |
| Resolution mode           | High resolution       |
| Collision Energie         | ± 35 V                |
| Collision Energie Spread  | 15                    |
| Ion Release Delay         | 30                    |
| Ion Release Width         | 15                    |
| Data collection           | IDA-MS                |

**Table S3** HPLC-MS mobile phases for targeted metabolomics

| Time (min) | A (%) | B (%) |
|------------|-------|-------|
| 0          | 15    | 85    |
| 3          | 70    | 30    |
| 12         | 98    | 2     |
| 15         | 98    | 2     |
| 16         | 15    | 85    |
| 25         | 15    | 85    |

Mobile phase A: 5% acetonitrile in 20 mM ammonium acetate buffer (pH 9.0), mobile phase B:  
acetonitrile

**Table S4** MS parameters for amino acids, organic acids and others

| Parameters        | Setting               |
|-------------------|-----------------------|
| Ionization method | Electrospray          |
| Ionization mode   | Positive and negative |
| Scan type         | MRM                   |
| Duration          | 25 min                |
| Curtain Gas       | 20.0 psi              |
| Collision Gas     | High (0.5 amu FWHH)   |
| IonSpray Voltage  | $\pm 4500$ V          |
| Temperature       | 500°C                 |
| Ion Source Gas 1  | 40 psi                |
| Ion Source Gas 2  | 50 psi                |
| Interface Heater  | On                    |

**Table S5** A list of MRM transitions for metabolites and their corresponding internal standards along with collision energy values

| No. | Analyte                                   | Q1<br>(m/z) | Q3<br>(m/z) | DP<br>(V) | CE<br>(V) |
|-----|-------------------------------------------|-------------|-------------|-----------|-----------|
| 1   | 1-Methyladenosine                         | 282.12      | 150.08      | 93        | 27        |
| 2   | 1-Methyl-Histidine                        | 170.09      | 96.07       | 93        | 20        |
| 3   | 2-Aminooctanoic acid                      | 160.00      | 55.30       | 93        | 21        |
| 4   | 2-Methylnicotinamide                      | 137.07      | 94.07       | 93        | 27        |
| 5   | 4-Aminobutyrate                           | 104.01      | 69.00       | 93        | 22        |
| 6   | 5'-Methylthioadenosine                    | 298.10      | 136.06      | 93        | 29        |
| 7   | 7,8-Dihydrofolate                         | 444.20      | 178.00      | 93        | 32        |
| 8   | 7-Methylguanosine                         | 298.11      | 177.03      | 93        | 24        |
| 9   | Acetoacetic acid                          | 103.04      | 95.05       | 93        | 20        |
| 10  | L-Acetylcarnitine                         | 203.15      | 144.10      | 93        | 27        |
| 11  | Acetyl-CoA                                | 808.12      | 184.07      | 93        | 53        |
| 12  | Acetyllysine                              | 189.00      | 84.00       | 93        | 23        |
| 13  | Acetylphosphate                           | 141.00      | 123.06      | 93        | 24        |
| 14  | Adenine                                   | 136.00      | 119.00      | 93        | 26        |
| 15  | Adenosine                                 | 268.15      | 136.10      | 93        | 29        |
| 16  | Aminoimidazole carboxamide ribonucleotide | 339.00      | 110.00      | 93        | 32        |
| 17  | AMP                                       | 348.15      | 136.00      | 93        | 23        |
| 18  | Arginine                                  | 175.12      | 116.07      | 93        | 20        |
| 19  | Argininosuccinic acid                     | 291.13      | 84.08       | 93        | 37        |
| 20  | Asparagine                                | 133.06      | 74.02       | 93        | 20        |
| 21  | Betaine                                   | 118.09      | 58.07       | 93        | 21        |
| 22  | Betaine aldehyde                          | 102.00      | 58.00       | 93        | 21        |
| 23  | Carnitine                                 | 162.10      | 103.00      | 93        | 20        |
| 24  | Choline                                   | 104.07      | 58.07       | 93        | 20        |
| 25  | Citrulline                                | 176.10      | 159.08      | 93        | 20        |
| 26  | Creatine                                  | 132.08      | 90.06       | 93        | 20        |
| 27  | Creatinine                                | 114.07      | 86.07       | 93        | 20        |
| 28  | Cysteine                                  | 122.03      | 76.06       | 93        | 20        |
| 29  | Cytidinemono phosphate                    | 324.05      | 112.05      | 93        | 20        |

|    |                         |        |        |    |    |
|----|-------------------------|--------|--------|----|----|
| 30 | Cytosine                | 112.05 | 70.07  | 93 | 20 |
| 31 | Deoxyadenosine          | 252.00 | 136.00 | 93 | 22 |
| 32 | Deoxyribose1-phosphate  | 215.03 | 72.08  | 93 | 25 |
| 33 | Diiodothyronine         | 525.50 | 352.80 | 93 | 31 |
| 34 | Dimethylglycine         | 104.11 | 60.08  | 93 | 21 |
| 35 | D/L-Pipecolic acid      | 130.00 | 84.00  | 93 | 18 |
| 36 | D-Ribulose5-phosphate   | 231.03 | 100.08 | 93 | 20 |
| 37 | FAD                     | 786.16 | 439.10 | 93 | 26 |
| 38 | Folate                  | 442.15 | 295.09 | 93 | 30 |
| 39 | Glucosamine             | 180.00 | 162.00 | 93 | 12 |
| 40 | Glucosamine6-phosphate  | 260.05 | 144.10 | 93 | 20 |
| 41 | Glutamine               | 147.08 | 130.05 | 93 | 20 |
| 42 | Glycerophosphocholine   | 258.10 | 104.00 | 93 | 16 |
| 43 | Glycine                 | 76.04  | 58.07  | 93 | 20 |
| 44 | Guanine                 | 152.06 | 135.03 | 93 | 20 |
| 45 | Guanosine               | 284.10 | 152.06 | 93 | 35 |
| 46 | Guanosinemono phosphate | 364.07 | 152.06 | 93 | 21 |
| 47 | Guanosinetriphosphate   | 524.00 | 184.07 | 93 | 25 |
| 48 | Histidine               | 156.08 | 110.07 | 93 | 20 |
| 49 | Histidinol              | 142.10 | 124.06 | 93 | 20 |
| 50 | Homocysteine            | 136.12 | 90.10  | 93 | 17 |
| 51 | Homoserine              | 120.07 | 103.05 | 93 | 32 |
| 52 | Hydroxyproline          | 132.07 | 68.05  | 93 | 20 |
| 53 | Indole                  | 118.07 | 91.05  | 93 | 20 |
| 54 | Isoleucine              | 132.10 | 86.10  | 93 | 20 |
| 55 | Kynurenine              | 209.09 | 94.07  | 93 | 25 |
| 56 | L-arginino-succinate    | 291.00 | 70.00  | 93 | 37 |
| 57 | L-Carnitine             | 162.11 | 103.04 | 93 | 20 |
| 58 | Leucine                 | 132.10 | 86.10  | 93 | 20 |
| 59 | L-methionine            | 150.06 | 104.05 | 93 | 20 |
| 60 | Lysine                  | 147.11 | 130.05 | 93 | 32 |
| 61 | Methionine sulfoxide    | 166.00 | 74.00  | 93 | 14 |
| 62 | Methylcysteine          | 136.04 | 119.05 | 93 | 20 |

|    |                                   |        |        |     |     |
|----|-----------------------------------|--------|--------|-----|-----|
| 63 | Methylnicotinamide                | 137.00 | 94.00  | 93  | 20  |
| 64 | N6-Acetyl-L-lysine                | 189.12 | 126.09 | 93  | 20  |
| 65 | N-acetyl-glucosamine              | 222.00 | 138.00 | 93  | 18  |
| 66 | N-acetyl-glutamate                | 190.07 | 130.05 | 93  | 20  |
| 67 | N-acetyl-L-ornithine              | 175.00 | 115.10 | 93  | 16  |
| 68 | N-acetylornithine                 | 175.11 | 116.07 | 93  | 20  |
| 69 | N-Acetylputrescine                | 131.11 | 114.09 | 93  | 20  |
| 70 | NAD <sup>+</sup>                  | 664.10 | 428.00 | 93  | 32  |
| 71 | NADH                              | 664.12 | 136.06 | 93  | 53  |
| 72 | N-carbamoyl-L-aspartate           | 177.05 | 74.00  | 93  | 19  |
| 73 | Ng,NG-dimethyl-L-arginine         | 203.15 | 116.07 | 93  | 24  |
| 74 | Nicotinamide                      | 123.06 | 80.05  | 93  | 22  |
| 75 | Ornithine                         | 133.10 | 70.07  | 93  | 20  |
| 76 | Phenylalanine                     | 166.09 | 120.08 | 93  | 30  |
| 77 | Proline                           | 116.07 | 70.07  | 93  | 20  |
| 78 | Propionyl-CoA                     | 824.15 | 184.07 | 93  | 33  |
| 79 | Purine                            | 121.05 | 94.07  | 93  | 35  |
| 80 | Pyridoxine                        | 170.08 | 152.07 | 93  | 24  |
| 81 | Ribose-5-phosphate                | 231.03 | 116.07 | 93  | 20  |
| 82 | Serine                            | 106.05 | 60.05  | 93  | 20  |
| 83 | S-methyl-5-thioadenosine          | 298.00 | 136.00 | 93  | 29  |
| 84 | Spermidine                        | 146.17 | 87.04  | 93  | 20  |
| 85 | Taurodeoxycholic acid             | 500.30 | 59.05  | 93  | 32  |
| 86 | Thiamine                          | 265.11 | 122.07 | 93  | 20  |
| 87 | Tryptophan                        | 205.10 | 146.06 | 93  | 20  |
| 88 | Tyrosine                          | 182.08 | 136.08 | 93  | 39  |
| 89 | UMP                               | 325.00 | 97.00  | 93  | 14  |
| 90 | Uracil                            | 113.04 | 70.07  | 93  | 22  |
| 91 | Urea                              | 61.04  | 61.04  | 93  | 21  |
| 92 | Valine                            | 118.09 | 72.08  | 93  | 20  |
| 93 | DL-Glutamic-2,4,4- <i>d3</i> acid | 151.15 | 107.00 | 93  | 17  |
| 94 | Fructose-6-phosphate              | 259.03 | 169.00 | -93 | -16 |
| 95 | Fucose1-phosphate                 | 243.03 | 96.97  | -93 | -32 |

|     |                                    |        |        |     |     |
|-----|------------------------------------|--------|--------|-----|-----|
| 96  | Glucose-1-phosphate                | 259.02 | 241.01 | -93 | -20 |
| 97  | (S)-2-Hydroxyglutarate             | 147.03 | 103.06 | -93 | -20 |
| 98  | 2,3-Diphospho glyceric acid        | 264.95 | 78.96  | -93 | -20 |
| 99  | 2-Dehydro-D-gluconate              | 193.00 | 103.00 | -93 | -14 |
| 100 | 2-Hydroxy-2-methylbutanedioic acid | 147.00 | 85.10  | -93 | -17 |
| 101 | 2-Isopropylmalic acid              | 175.00 | 115.00 | -93 | -19 |
| 102 | 2-Keto-hexanoic acid               | 129.06 | 84.94  | -93 | -20 |
| 103 | 2-Keto-isovalerate                 | 115.05 | 71.05  | -93 | -13 |
| 104 | 2-Oxo-4-methylthiobutanoate        | 147.01 | 103.06 | -93 | -20 |
| 105 | 2-Phenyl-propionate                | 149.06 | 105.07 | -93 | -21 |
| 106 | 3-Methyl-phenylacetic acid         | 149.00 | 105.00 | -93 | -12 |
| 107 | 4-Hydroxy-phenyl-pyruvate          | 179.03 | 87.01  | -93 | -20 |
| 108 | 4-Pyridoxic acid                   | 182.00 | 138.00 | -93 | -18 |
| 109 | 5-Phosphoribosyl-1-pyrophosphate   | 389.00 | 291.00 | -93 | -20 |
| 110 | 6-Phosphonoglucono-D-lactone       | 257.01 | 195.17 | -93 | -20 |
| 111 | Acetoacetate                       | 101.05 | 57.20  | -93 | -14 |
| 112 | Aconitate                          | 173.05 | 85.00  | -93 | -17 |
| 113 | $\alpha$ -Ketoglutarate            | 145.00 | 101.00 | -93 | -13 |
| 114 | Aminoadipic acid                   | 160.00 | 116.00 | -93 | -18 |
| 115 | Anthranilate                       | 136.00 | 92.00  | -93 | -18 |
| 116 | Ascorbic acid                      | 175.00 | 87.00  | -93 | -19 |
| 117 | Atrolactic acid                    | 165.00 | 119.00 | -93 | -21 |
| 118 | Carbamoyl phosphate                | 140.00 | 79.00  | -93 | -24 |
| 119 | Cholesteryl sulfate                | 465.30 | 96.96  | -93 | -22 |
| 120 | Cholic acid                        | 407.20 | 345.20 | -93 | -32 |
| 121 | Citraconic acid                    | 129.00 | 85.10  | -93 | -13 |
| 122 | Deoxycholic acid                   | 391.20 | 345.20 | -93 | -36 |
| 123 | D-Glucarate                        | 209.03 | 165.02 | -93 | -20 |
| 124 | D-Gluconate                        | 195.00 | 129.00 | -93 | -17 |
| 125 | D-Glucose 6-phosphate              | 259.02 | 96.97  | -93 | -20 |
| 126 | D-Glucuronic acid                  | 193.04 | 113.02 | -93 | -20 |
| 127 | D-Glyceraldehyde-3-phosphate       | 169.05 | 97.00  | -93 | -14 |
| 128 | Dihydroorotate                     | 157.00 | 113.00 | -93 | -14 |

|     |                              |        |        |     |     |
|-----|------------------------------|--------|--------|-----|-----|
| 129 | Gluconic acid                | 195.05 | 75.01  | -93 | -20 |
| 130 | Guanidoacetic acid           | 116.00 | 74.30  | -93 | -15 |
| 131 | Hydroxyisocaproic acid       | 131.01 | 85.10  | -93 | -16 |
| 132 | Hydroxyphenylaceticacid      | 151.04 | 107.05 | -93 | -26 |
| 133 | Hypoxanthine                 | 135.03 | 92.02  | -93 | -20 |
| 134 | Indole-3-carboxylic acid     | 160.00 | 116.00 | -93 | -20 |
| 135 | Indole-acrylic acid          | 186.00 | 142.03 | -93 | -20 |
| 136 | Inosine                      | 267.07 | 135.03 | -93 | -27 |
| 137 | Kynurenic acid               | 188.00 | 144.00 | -93 | -21 |
| 138 | Lactate                      | 89.00  | 43.20  | -93 | -16 |
| 139 | L-Dihydroorotic acid         | 157.03 | 113.03 | -93 | -20 |
| 140 | Maleic acid                  | 115.03 | 71.03  | -93 | -13 |
| 141 | Methylmalonic acid           | 117.00 | 73.10  | -93 | -13 |
| 142 | Myo-inositol                 | 179.06 | 87.01  | -93 | -20 |
| 143 | Orotic acid                  | 155.01 | 111.02 | -93 | -20 |
| 144 | Orotidine-5-phosphate        | 367.00 | 323.00 | -93 | -18 |
| 145 | Oxalacetic acid              | 131.00 | 87.04  | -93 | -20 |
| 146 | Oxaloacetate                 | 131.00 | 87.00  | -93 | -14 |
| 147 | Oxoglutaric acid             | 145.01 | 101.02 | -93 | -20 |
| 148 | p-Aminobenzoate              | 136.05 | 92.00  | -93 | -18 |
| 149 | p-Aminobenzoic acid          | 136.04 | 92.02  | -93 | -20 |
| 150 | Pantothenate                 | 218.10 | 88.04  | -93 | -21 |
| 151 | Phenyl-lactic acid           | 165.01 | 103.10 | -93 | -21 |
| 152 | Phenyl-propionic acid        | 145.00 | 101.00 | -93 | -18 |
| 153 | Phosphoenolpyruvic acid      | 166.01 | 122.09 | -93 | -20 |
| 154 | p-Hydroxybenzoate            | 137.00 | 93.00  | -93 | -23 |
| 155 | p-Salicylicacid              | 179.07 | 93.03  | -93 | -23 |
| 156 | Pyroglutamic acid            | 128.00 | 82.10  | -93 | -19 |
| 157 | Quinolinic acid              | 165.06 | 73.00  | -93 | -24 |
| 158 | Sedoheptulose7-phosphate     | 289.03 | 96.97  | -93 | -27 |
| 159 | Shikimate                    | 173.05 | 93.03  | -93 | -20 |
| 160 | S-ribosyl-L-homocysteine_neg | 266.00 | 134.00 | -93 | -20 |
| 161 | Succinate                    | 117.02 | 73.03  | -93 | -20 |

|     |                                     |        |        |     |     |
|-----|-------------------------------------|--------|--------|-----|-----|
| 162 | Trans-Aconiticacid                  | 173.01 | 85.03  | -93 | -20 |
| 163 | Trehalose                           | 341.11 | 142.97 | -93 | -20 |
| 164 | Trehalose-sucrose                   | 341.00 | 179.00 | -93 | -20 |
| 165 | Uric acid                           | 167.00 | 124.00 | -93 | -17 |
| 166 | Uridine                             | 243.06 | 110.02 | -93 | -21 |
| 167 | Xanthine                            | 151.03 | 108.02 | -93 | -23 |
| 168 | Xanthosine                          | 283.07 | 151.02 | -93 | -24 |
| 169 | Xanthurenic acid                    | 204.00 | 160.00 | -93 | -19 |
| 170 | Allantoin                           | 157.04 | 97.00  | -93 | -20 |
| 171 | Taurine                             | 124.01 | 79.96  | -93 | -20 |
| 172 | Taurodeoxycholic acid               | 498.20 | 124.00 | -93 | -53 |
| 173 | Taurocholic acid                    | 514.28 | 124.01 | -93 | -80 |
| 174 | Taurocholic acid-3-sulfate          | 594.24 | 96.96  | -93 | -30 |
| 175 | Taurochenodeoxycholic acid          | 498.29 | 106.98 | -93 | -72 |
| 176 | Taurohyocholic acid                 | 514.28 | 106.98 | -93 | -80 |
| 177 | Taurolithocholic acid               | 482.29 | 79.96  | -93 | -80 |
| 178 | Tauro- $\beta$ -muricholic acid     | 514.28 | 79.96  | -93 | -80 |
| 179 | Glycolcholic acid-3-sulfate         | 544.26 | 74.02  | -93 | -40 |
| 180 | Glycohyocholic acid                 | 464.30 | 74.02  | -93 | -50 |
| 181 | Glycolithocholic acid               | 432.31 | 74.02  | -93 | -50 |
| 182 | Lithocholic acid                    | 375.29 | 375.29 | -93 | -16 |
| 183 | Lithocholic acid-3-sulfate          | 455.25 | 96.96  | -93 | -40 |
| 184 | Hyocholic acid                      | 407.28 | 407.28 | -93 | -10 |
| 185 | Hyodeoxycholic acid                 | 391.29 | 391.29 | -93 | -15 |
| 186 | Tauroursodeoxycholic acid-3-sulfate | 578.25 | 96.96  | -93 | -40 |
| 187 | Hendecanoic acid                    | 185.29 | 185.29 | -93 | -10 |
| 188 | Nonadecanoic acid                   | 297.50 | 297.50 | -93 | -10 |

**Table S6** Information of differential metabolites between Normal group and DSS group

| No. | Metabolites                                                                                  | Formula    | VIP   | Normal vs DSS | Mode |
|-----|----------------------------------------------------------------------------------------------|------------|-------|---------------|------|
| 1   | PAF (Platelet activating factor)                                                             | C26H54NO7P | 2.722 | ↓(**)         | +    |
| 2   | Questin_120240                                                                               | C16H12O5   | 1.928 | ↓(**)         | +    |
| 3   | <i>p</i> -Coumaric acid                                                                      | C9H8O3     | 1.905 | ↓(**)         | +    |
| 4   | Lysophosphatidylcholine_16_0                                                                 | C24H50NO7P | 1.901 | ↓(**)         | +    |
| 5   | Norleucine                                                                                   | C6H13NO2   | 1.893 | ↓(**)         | +    |
| 6   | Phenylalanine                                                                                | C9H11NO2   | 1.790 | ↓(**)         | +    |
| 7   | Tyrosine                                                                                     | C9H11NO3   | 1.785 | ↓(**)         | +    |
| 8   | Kaurenic acid                                                                                | C20H30O2   | 1.565 | ↑(***)        | +    |
| 9   | Bis(2-ethylhexyl) phthalate                                                                  | C24H38O4   | 1.270 | ↓(*)          | +    |
| 10  | Dexamethasone                                                                                | C22H29FO5  | 1.251 | ↑(*)          | +    |
| 11  | Cucurbitacin E                                                                               | C32H44O8   | 1.153 | ↓(**)         | +    |
| 12  | Heptelidic acid<br>chlorohydrin_130129                                                       | C15H21ClO5 | 1.083 | ↓(**)         | +    |
| 13  | 1-Cyclopropyl-6,7-difluoro-1,4-<br>dihydro-8-hydroxy-4-oxo-3-<br>quinoline-3-carboxylic acid | C13H9F2NO4 | 1.292 | ↑(***)        | -    |
| 14  | 2-(3-(8-Hydroxyoctyl) phenoxy)-2-<br>methylpropanoic acid                                    | C18H28O4   | 1.696 | ↑(***)        | -    |
| 15  | 2'-Deoxyuridine 5'-mono-<br>phosphate                                                        | C9H13N2O8P | 1.454 | ↓(***)        | -    |
| 16  | 2-Oxoadipate                                                                                 | C6H8O5     | 1.140 | ↑(*)          | -    |
| 17  | 3-(4-Hydroxyphenyl) lactate                                                                  | C9H10O4    | 1.420 | ↓(***)        | -    |
| 18  | 3-Dehydroshikimate                                                                           | C7H8O5     | 1.440 | ↓(**)         | -    |
| 19  | 3-Hydroxyanthranilate                                                                        | C7H7NO3    | 1.007 | ↓(*)          | -    |
| 20  | 3-Hydroxybutanoic acid                                                                       | C4H8O3     | 1.552 | ↓(*)          | -    |
| 21  | 4-Acetamidobutanoate                                                                         | C6H11NO3   | 1.205 | ↑(***)        | -    |
| 22  | 4-Imidazoleacetic acid                                                                       | C5H6N2O2   | 1.019 | ↓(*)          | -    |
| 23  | 4'-Methylgenistein                                                                           | C16H12O5   | 1.339 | ↓(***)        | -    |
| 24  | 5-Hydroxy-3,7-dimethoxy-2-(4-<br>methoxyphenyl)-4H-chromen-4-<br>one                         | C18H16O6   | 1.300 | ↑(***)        | -    |

|    |                            |               |       |         |   |
|----|----------------------------|---------------|-------|---------|---|
| 25 | 5-Oxo-D-proline            | C5H7NO3       | 1.127 | ↓(**)   | - |
| 26 | Butein                     | C15H12O5      | 1.081 | ↓(**)   | - |
| 27 | Cortisol                   | C21H30O5      | 1.470 | ↑(****) | - |
| 28 | Cytidine 5'-diphosphate    | C9H15N3O11P2  | 1.284 | ↑(***)  | - |
| 29 | Deoxyuridine               | C9H12N2O5     | 1.291 | ↑(***)  | - |
| 30 | D-Glyceric acid            | C3H6O4        | 1.030 | ↑(**)   | - |
| 31 | Ferulate                   | C10H10O4      | 1.153 | ↑(**)   | - |
| 32 | Formyl-L-methionyl peptide | C6H11NO3S     | 1.029 | ↑(*)    | - |
| 33 | Fructose                   | C6H12O6       | 1.344 | ↓(****) | - |
| 34 | Genistein                  | C15H10O5      | 1.182 | ↓(*)    | - |
| 35 | Glyceraldehyde             | C3H6O3        | 1.645 | ↓(***)  | - |
| 36 | Glycocholate               | C26H43NO6     | 1.422 | ↓(*)    | - |
| 37 | Homovanillate              | C9H10O4       | 1.577 | ↓(**)   | - |
| 38 | Inosine 5'-diphosphate     | C10H14N4O11P2 | 1.036 | ↑(*)    | - |
| 39 | Leucine                    | C6H13NO2      | 1.205 | ↓(**)   | - |
| 40 | L-Histidine                | C6H9N3O2      | 1.535 | ↓(**)   | - |
| 41 | Linoleic acid              | C18H32O2      | 1.423 | ↑(****) | - |
| 42 | Linolenic acid             | C18H30O2      | 1.299 | ↑(**)   | - |
| 43 | L-Lysine                   | C6H14N2O2     | 1.480 | ↓(***)  | - |
| 44 | Myristic acid              | C14H28O2      | 1.458 | ↑(****) | - |
| 45 | Palmitoleic acid           | C16H30O2      | 1.158 | ↑(**)   | - |
| 46 | Riboflavin                 | C17H20N4O6    | 1.623 | ↓(**)   | - |
| 47 | Succinate                  | C4H6O4        | 1.284 | ↓(***)  | - |
| 48 | Taurine                    | C2H7NO3S      | 1.314 | ↓(**)   | - |

**Table S7** Information of differential metabolites between ASA group and DSS group

| No. | ASA/DSS metabolites                | Formula                                                       | VIP   | ASA vs DSS | Mode |
|-----|------------------------------------|---------------------------------------------------------------|-------|------------|------|
| 1   | Phenylalanine                      | C <sub>9</sub> H <sub>11</sub> NO <sub>2</sub>                | 2.494 | ↓(**)      | +    |
| 2   | Norleucine                         | C <sub>6</sub> H <sub>13</sub> NO <sub>2</sub>                | 2.473 | ↓(**)      | +    |
| 3   | p-Coumaric acid                    | C <sub>9</sub> H <sub>8</sub> O <sub>3</sub>                  | 2.410 | ↓(*)       | +    |
| 4   | Methionine                         | C <sub>5</sub> H <sub>11</sub> NO <sub>2</sub> S              | 2.310 | ↓(**)      | +    |
| 5   | 2-Acetoxy-6-pentadecylbenzoic acid | C <sub>24</sub> H <sub>38</sub> O <sub>4</sub>                | 1.263 | ↑(*)       | -    |
| 6   | 3-Dehydroshikimate                 | C <sub>7</sub> H <sub>8</sub> O <sub>5</sub>                  | 1.593 | ↓(*)       | -    |
| 7   | 3-Hydroxyanthranilate              | C <sub>7</sub> H <sub>7</sub> NO <sub>3</sub>                 | 2.198 | ↑(**)      | -    |
| 8   | 4-Imidazoleacetic acid             | C <sub>5</sub> H <sub>6</sub> N <sub>2</sub> O <sub>2</sub>   | 1.544 | ↓(*)       | -    |
| 9   | Adenine                            | C <sub>5</sub> H <sub>5</sub> N <sub>5</sub>                  | 1.509 | ↑(*)       | -    |
| 10  | Azelaic acid                       | C <sub>9</sub> H <sub>16</sub> O <sub>4</sub>                 | 1.348 | ↑(*)       | -    |
| 11  | D-Glucosamine 6-phosphate          | C <sub>6</sub> H <sub>14</sub> NO <sub>8</sub> P              | 1.900 | ↑(**)      | -    |
| 12  | Fructose                           | C <sub>6</sub> H <sub>12</sub> O <sub>6</sub>                 | 1.398 | ↓(*)       | -    |
| 13  | L-Histidine                        | C <sub>6</sub> H <sub>9</sub> N <sub>3</sub> O <sub>2</sub>   | 2.181 | ↓(**)      | -    |
| 14  | L-Lysine                           | C <sub>6</sub> H <sub>14</sub> N <sub>2</sub> O <sub>2</sub>  | 2.352 | ↓(***)     | -    |
| 15  | Palmitoleic acid                   | C <sub>16</sub> H <sub>30</sub> O <sub>2</sub>                | 1.754 | ↓(***)     | -    |
| 16  | Thymidine                          | C <sub>10</sub> H <sub>14</sub> N <sub>2</sub> O <sub>5</sub> | 1.651 | ↓(**)      | -    |

**Table S8** The relative concentration of metabolites in each group

| No. | Metabolites                         | Relative concentration (ng/mL/100 mg feces) |                 |                  |                  |
|-----|-------------------------------------|---------------------------------------------|-----------------|------------------|------------------|
|     |                                     | Normal                                      | DSS             | ASA              | LBP-3            |
| 1   | (S)-2-Hydroxyglutarate              | 29.58±16.71***                              | 135.16±59.29    | 40.84±28.79**    | 27.14±18.34***   |
| 2   | 1D-Myo-Inositol3-phosphate          | 30.07±13.48                                 | 23.5±15.09      | 40.6±23.81       | 56.26±26.37*     |
| 3   | 2-Isopropylmalic acid               | 3246.9±1247.89*                             | 8236.39±4426.79 | 4834.91±2740.54  | 3080.83±1942.11* |
| 4   | 2-Keto-isovalerate                  | 70.3±16.13                                  | 113.82±47.47    | 72.3±37.75       | 47.18±26.25*     |
| 5   | 2-Oxo-4-methylthiobutanoate         | 31.52±20.47**                               | 97.44±45.72     | 83.05±54.32      | 52.32±31.39      |
| 6   | 4-Hydroxyphenylpyruvate             | 5.06±1.11***                                | 38.9±13.26      | 65.05±44.76      | 42.18±25.02      |
| 7   | 6-Phosphonoglucono-D-lactone        | 255.71±145.03**                             | 57.64±31.14     | 420.14±222.98*** | 485.51±248.22**  |
| 8   | Acetoacetate                        | 33.09±13.09                                 | 29.86±19.62     | 14.71±8.22       | 6.57±4.01**      |
| 9   | α-Ketoglutarate                     | 187.26±70.43                                | 121.45±90.12    | 49.13±16.66*     | 129.29±81        |
| 10  | Anthranilate                        | 81.41±26.52                                 | 113.73±64.47    | 329.51±189.06*   | 106.63±56.01     |
| 11  | Ascorbic acid                       | 1406.23±511.6*                              | 3778.98±2254.85 | 2128.77±1691.81  | 1835.35±1443.28* |
| 12  | Cholic acid                         | 21.14±16.25*                                | 157.66±125      | 60.14±56.45      | 164.72±234.67    |
| 13  | Citraconic acid                     | 200.3±87.57                                 | 233.46±143.8    | 218.09±131.35    | 68.34±58.23*     |
| 14  | Deoxycholic acid                    | 1694.36±628.79*                             | 3284.37±2272.44 | 4457.64±1455.38  | 7347.83±3520.94  |
| 15  | D-Glucarate                         | 26.17±11.96                                 | 41.18±22.89     | 178.53±67.45***  | 47.03±24.72      |
| 16  | D-Gluconate                         | 105.46±72.26                                | 241.34±123.15   | 172.88±144.31    | 137.71±73.37*    |
| 17  | D-Glucose 6-phosphate               | 20.09±7.59                                  | 27.05±12.83     | 40.4±22.96       | 9.74±7.02**      |
| 18  | Gluconic acid                       | 187.07±90.27*                               | 451.39±238.16   | 311.97±254.44    | 167.02±75.45*    |
| 19  | Kynurenic acid                      | 56.05±19.07**                               | 108.83±42.79    | 98.97±70.38      | 114.75±87.02     |
| 20  | Lactate                             | 23.44±13.82**                               | 97.14±47.36     | 52.93±24.44      | 32.22±21.07      |
| 21  | Maleic acid                         | 66.02±24.05                                 | 115.39±42.71    | 102.65±72.29     | 37.98±24.12**    |
| 22  | Methylmalonic acid                  | 387.84±98.03*                               | 878.38±299.14   | 916.82±434.71    | 578.74±203.49    |
| 23  | Myo-inositol                        | 26.44±9.94*                                 | 67.31±35.45     | 88.7±38.73       | 40.83±21.62      |
| 24  | N-Acetyl-α-D-glucosamine1-phosphate | 7.68±3.42*                                  | 32.54±22.27     | 30.21±37.23      | 10.53±12.96      |

|    |                                           |                 |                |                     |                 |
|----|-------------------------------------------|-----------------|----------------|---------------------|-----------------|
| 25 | Orotidine-5-phosphate                     | 9.02±3.43       | 6.01±1.93      | 9.74±4.55           | 12.7±3.56*      |
| 26 | Oxalacetic acid                           | 100.96±68.64    | 120.83±46.95   | 103.79±84.29        | 45.59±22.93**   |
| 27 | p-Aminobenzoate                           | 76.42±24.79     | 129.46±50.72   | 300.83±182.96*      | 125.76±79.48    |
| 28 | p-Aminobenzoic acid                       | 79.66±22.41     | 119.98±58.75   | 306.61±130.71*      | 107.73±77.78    |
| 29 | Phosphoenolpyruvic acid                   | 71.87±32.46     | 62.03±50.03    | 460.48±264.68**     | 280.48±170.81** |
| 30 | p-Salicylic acid                          | 43.25±21.01     | 62.59±47.16    | 65.85±49.9          | 22.47±22.77*    |
| 31 | Succinate                                 | 360.24±155.69** | 1060.91±575.59 | 2061.77±1432.8      | 838.1±713.86    |
| 32 | Taurine                                   | 2329.76±572.49* | 5745.5±3184.41 | 4782.26±2718.09     | 2719.86±688.66* |
| 33 | Xanthine                                  | 47.63±21.12     | 91.28±85.47    | 13254.19±6579.66*** | 72.23±36.31     |
| 34 | Xanthurenic acid                          | 980.81±462.24** | 316.16±290.11  | 430.17±280.73       | 141.2±121       |
| 35 | Allantoin                                 | 508.02±137.07** | 1079.19±462.86 | 831.87±541.5        | 1330.6±843.49   |
| 36 | Deoxycholic acid-3-sulfate                | 14.42±9.27**    | 42.78±21.53    | 74.67±49.49         | 46±35.17        |
| 37 | Taurocholic acid-3-sulfate                | 7.19±4.6**      | 22.83±12.33    | 8.53±6.25           | 19.1±16.82      |
| 38 | Tauroursodeoxycholic acid-3-sulfate       | 22.53±13.83*    | 96.58±32.09    | 207.94±136.88*      | 53.48±38.62     |
| 39 | 1-Methyladenosine                         | 18.77±14.13     | 45.47±25.6     | 61.79±31.79         | 11.79±6.36**    |
| 40 | 2-Aminooctanoic acid                      | 3.86±1.53       | 2.67±1.19      | 9.04±7.59           | 26.39±16.69**   |
| 41 | 2-Methylnicotinamide                      | 201.82±71.94**  | 86.92±36.03    | 280.53±105.57       | 86.63±83.14     |
| 42 | 7,8-Dihydrofolate                         | 2.03±2.05       | 2.84±2.43      | 1.93±1.15           | 7.77±3.87*      |
| 43 | 7-Methylguanosine                         | 2.4±0.85***     | 0.92±0.39      | 2.75±1.94           | 3.75±2.21**     |
| 44 | Acetoacetic acid                          | 7.88±3.79**     | 17.36±5.52     | 8.32±6.7            | 7.36±2.66**     |
| 45 | L-Acetylcarnitine                         | 4.39±2.19       | 6.13±1.65      | 9.15±4.51           | 11.43±4.12**    |
| 46 | Acetylphosphate                           | 8.27±3.01*      | 16.03±6.65     | 17.14±6.98          | 21.37±5.05      |
| 47 | Adenine                                   | 117.61±68.93    | 27.16±15.04    | 80.03±64.24         | 140.27±64.83*** |
| 48 | Adenosine                                 | 21.4±14.69      | 11.11±2.94     | 29.07±13.48         | 70.77±47.23**   |
| 49 | Aminoimidazole carboxamide Ribonucleotide | 1.52±0.95       | 2.62±1.9       | 3.11±1.67           | 8.67±5**        |
| 50 | AMP                                       | 0.76±0.34       | 0.44±0.23      | 4.5±2.63**          | 2.09±1.42**     |
| 51 | Betaine                                   | 69.57±15.96**   | 44.98±14.06    | 63.32±23.39         | 122.02±37.81*   |
| 52 | Betaine aldehyde                          | 22.96±3.95***   | 5.89±2.78      | 12.33±9.32          | 2.62±2.12       |
| 53 | Cytidinemonophosphate                     | 1.31±1.07**     | 0.39±0.19      | 1.31±1.17**         | 1.05±0.53**     |

|    |                         |                |               |                |               |
|----|-------------------------|----------------|---------------|----------------|---------------|
| 54 | Cytosine                | 7.25±3.16      | 4.46±1.52     | 8.35±3.27      | 14.44±9.57**  |
| 55 | Deoxyadenosine          | 5.22±2.32**    | 1.55±1.04     | 2.9±1.47       | 4.81±1.9**    |
| 56 | Deoxyribose 1-phosphate | 1.9±0.67**     | 9.8±6.18      | 10.74±9.86     | 27.59±12.57** |
| 57 | Diiodothyronine         | 11.9±6.86*     | 4.2±1.47      | 9.2±4.79       | 28.71±18.38** |
| 58 | D-Ribulose 5-phosphate  | 4.74±4.14      | 1.68±0.7      | 4.73±3.89      | 16.29±10.08** |
| 59 | FAD                     | 0.3±0.08       | 0.66±0.42     | 0.79±0.49      | 1.97±1.53*    |
| 60 | Folate                  | 3.32±1.74      | 2.95±1.09     | 4.38±2.73      | 7.77±2.5***   |
| 61 | Glucosamine 6-phosphate | 1.27±0.73      | 1.22±0.52     | 2.54±1.42      | 4.85±2.87**   |
| 62 | Glutamine               | 2.89±1.26**    | 9.95±2.17     | 5.67±3.51      | 4.92±1.37**   |
| 63 | Guanine                 | 35.14±24.16**  | 6.43±2.68     | 8.51±5.92      | 11.32±4.74    |
| 64 | Histidinol              | 5.93±7.56      | 5.32±1.64     | 5.87±2.1       | 14.27±5.2***  |
| 65 | Homocysteine            | 21.1±11.56     | 36.61±10.52   | 18.26±12.09*   | 17.68±5.99**  |
| 66 | Homoserine              | 196.75±80.95** | 506.06±141.23 | 243.56±177.16* | 211.05±54.91* |
| 67 | Hydroxyproline          | 1.27±0.35      | 1.22±0.37     | 2.87±1.78***   | 3.23±1.23***  |
| 68 | Imidazoleacetic acid    | 29.04±8.74     | 50.45±31.18   | 32.7±20.21     | 17.12±11.4*   |
| 69 | Indole                  | 2.43±0.64      | 1.76±0.63     | 4.66±2.13**    | 3.89±2.56**   |
| 70 | Isoleucine              | 15.78±7.22**   | 39.69±9.94    | 23.36±16.58    | 17.17±10.99** |
| 71 | Kynurenine              | 6.66±1.55***   | 1.63±0.72     | 2.77±0.67      | 5.87±2.49*    |
| 72 | Leucine                 | 19.12±7.67**   | 43.35±18.28   | 25.34±15.17    | 16.37±2.94**  |
| 73 | Lysine                  | 4.56±1.75*     | 0.65±0.38     | 2.25±1.71*     | 2.04±0.7**    |
| 74 | Methionine              | 1.37±0.93      | 0.93±0.48     | 1.42±0.66      | 4.03±2.03**   |
| 75 | Methylcysteine          | 33.21±18.22**  | 81.44±25.15   | 39.19±26       | 54.28±40.48   |
| 76 | Methylnicotinamide      | 51.84±17.76**  | 25.81±7.3     | 47.33±32.3     | 19.16±13.67   |
| 77 | N-acetyl-glucosamine    | 5.86±3.86      | 2.89±1.8      | 7.11±6.55      | 9.29±4.17**   |
| 78 | NADH                    | 1.9±0.76       | 1.44±0.63     | 4.02±1.95      | 6.69±4.25**   |
| 79 | Nicotinamide            | 11.52±4.92**   | 34.58±10.04   | 24.48±15.44    | 56.34±25.6    |
| 80 | Phenylalanine           | 14.29±6.57***  | 41.33±10.24   | 17.12±11.79**  | 16.8±5.23***  |
| 81 | Purine                  | 3.6±1.27**     | 10.14±4.15    | 7.49±7.86      | 6.61±2.5      |
| 82 | Pyridoxine              | 1.89±0.58      | 1.48±0.92     | 2.5±1.72       | 6.58±2.15**   |

|    |            |              |              |             |              |
|----|------------|--------------|--------------|-------------|--------------|
| 83 | Spermidine | 65.4±17.76** | 125.07±41.96 | 122.37±21.7 | 184.51±88.52 |
| 84 | Tryptophan | 2.23±1.44*   | 1±0.35       | 0.95±0.71   | 4.84±1.07**  |
| 85 | Tyrosine   | 5.66±2.9     | 4.13±1.13    | 5.99±3.51   | 17.51±4.97** |

---

Differential metabolites were analysed using Student's t-test with FDR correction (\* $p < 0.05$ , \*\* $p < 0.01$  and \*\*\* $p < 0.001$  vs DSS group)

Figure S1

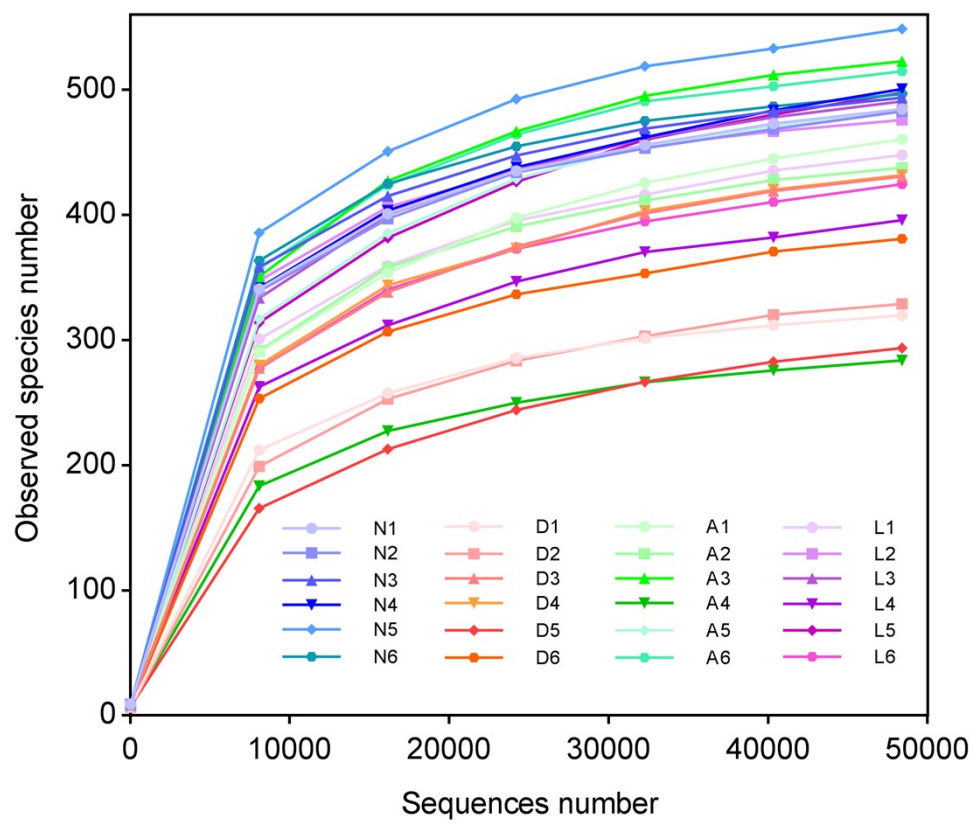

**Figure S2**

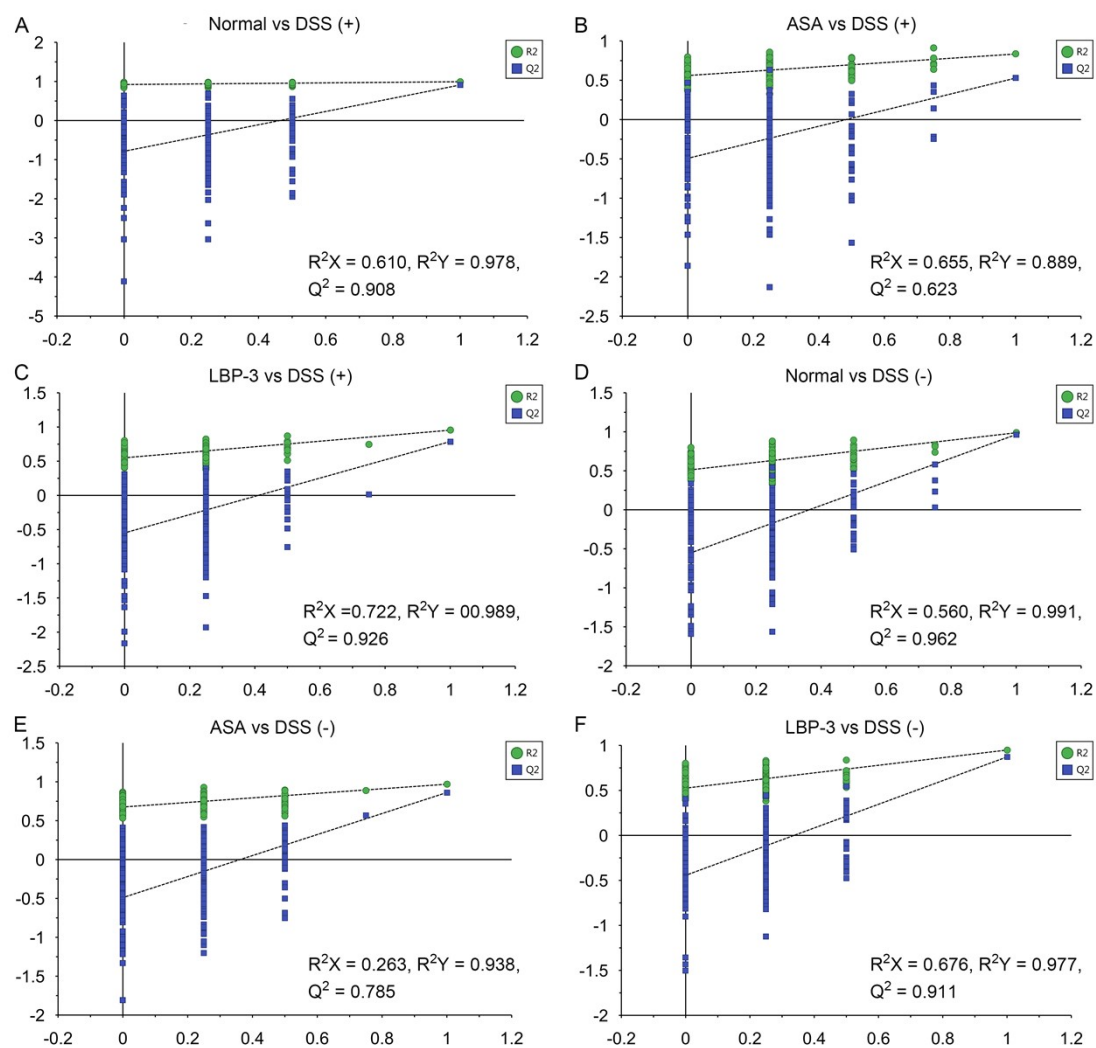

Figure S3

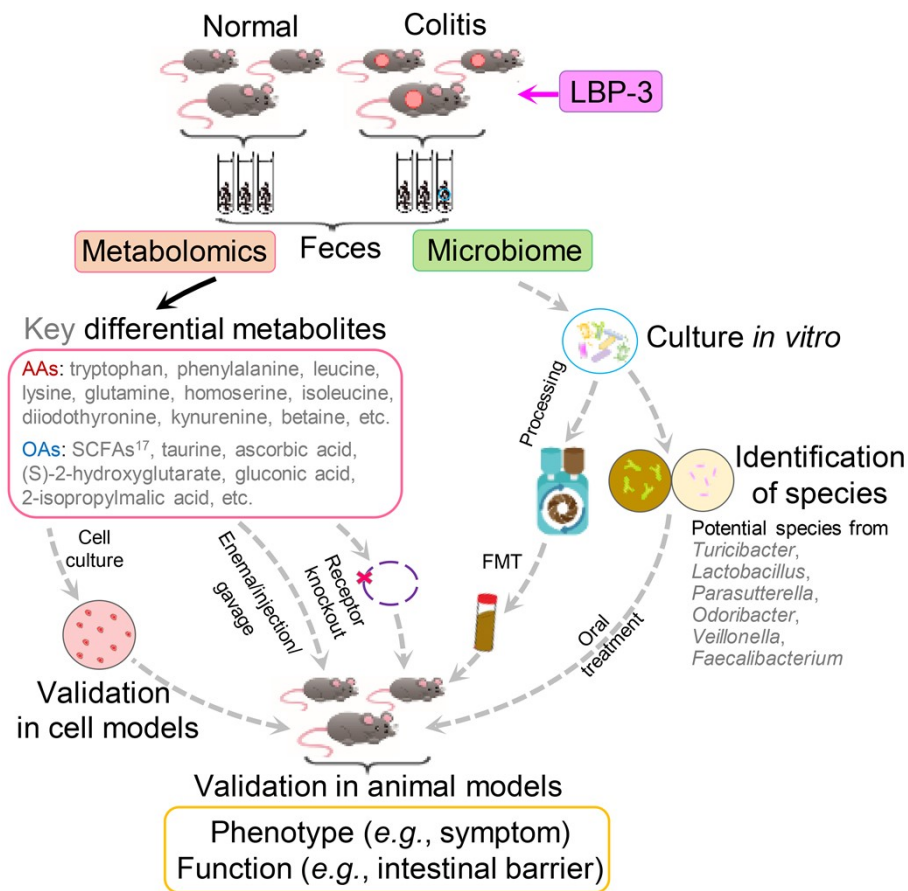

Supplement: d2fo01283a1.pdf [file d2fo01283a1.pdf]
